# Supplementary material for: Dissolution-enhanced emission of 1,3,6,8-tetrakis(p-benzoic acid)pyrene for selectively detecting protamine and “on-to-on” heparin detection in water
Source: Royal Society of Chemistry journal article supplement (doi:10.1039/d1nj03946f), 2021-11-22
Supplement: d1nj03946f1.pdf [file d1nj03946f1.pdf]

## Electronic Supplementary Information (ESI)

### **Dissolution-enhanced emission of 1,3,6,8-Tetrakis(p-benzoic acid)pyrene for selectively detecting protamine and “on-to-on” heparin detection in water**

Hongtao Li,<sup>‡</sup> Yuting Zhang,<sup>‡</sup> Yan Huang,\* Dapeng Cao, Shitao Wang\*

State Key Laboratory of Organic-Inorganic Composites, Beijing University of Chemical Technology,  
Beijing 100029 (P. R. China)

\*Corresponding authors: [huangyan@buct.edu.cn](mailto:huangyan@buct.edu.cn); or [stwang@buct.edu.cn](mailto:stwang@buct.edu.cn)

<sup>‡</sup> Equally contributed to this work.

## Competition experiments.

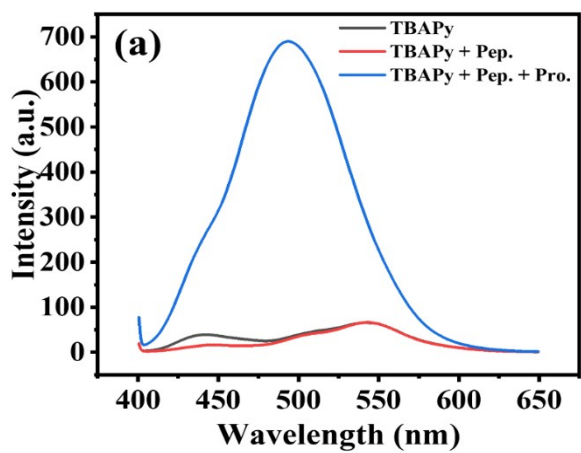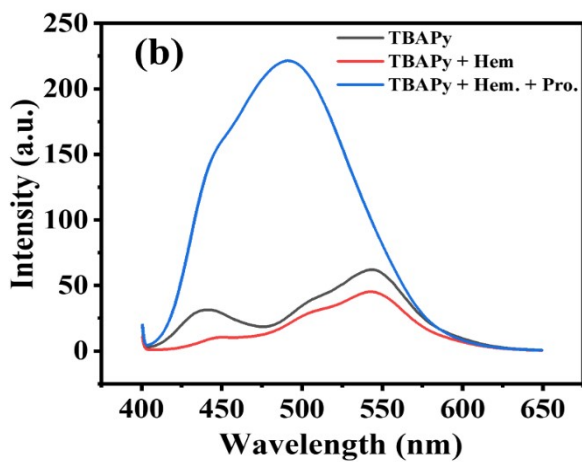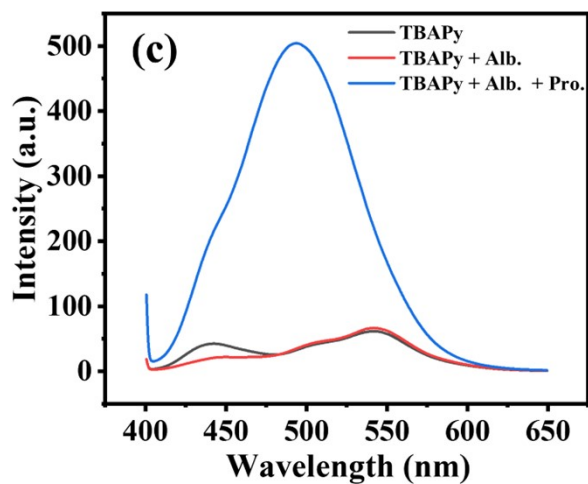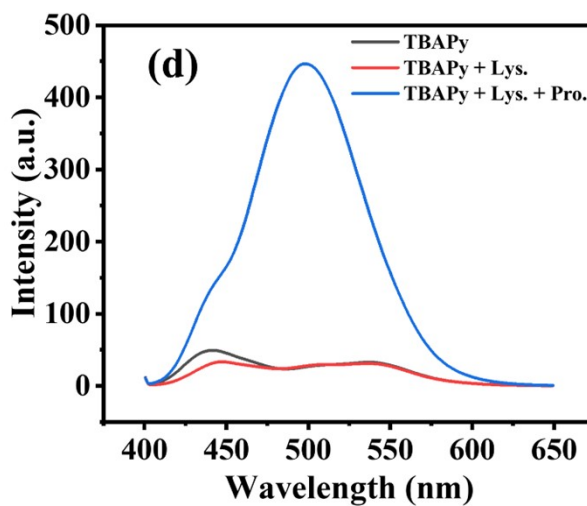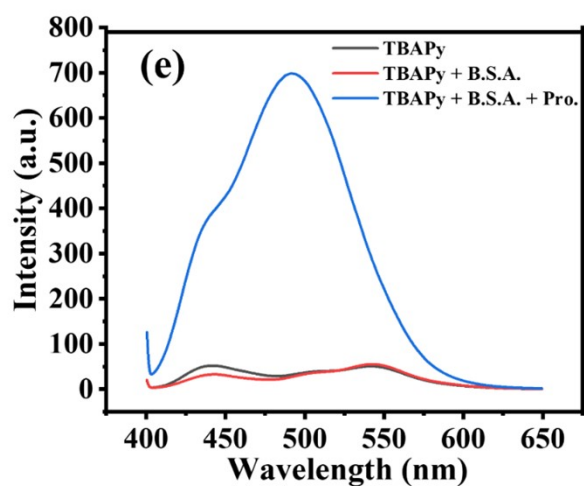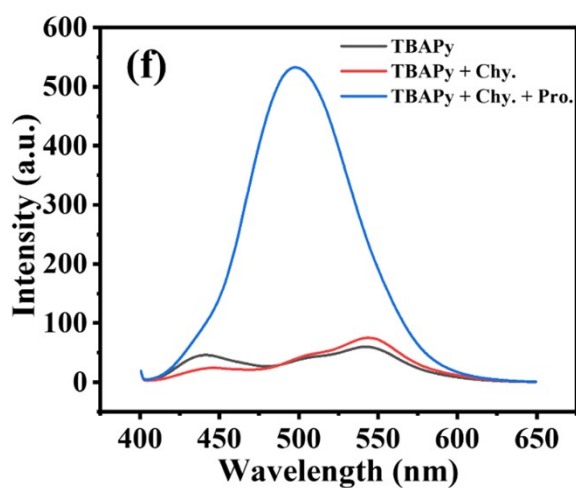

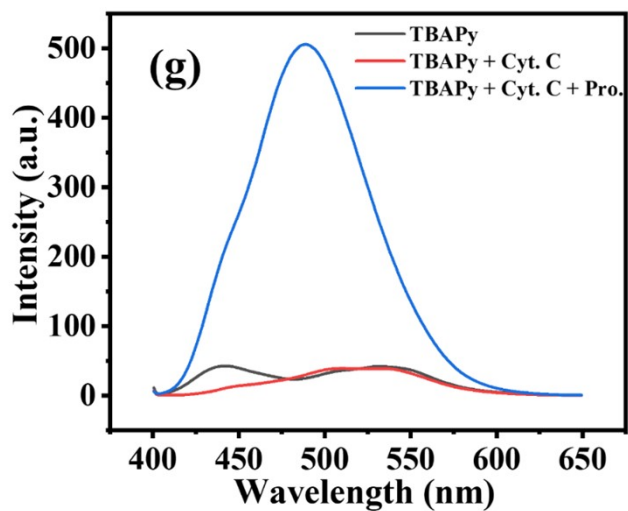

**Figure S1.** Competition experiments (a~g): Fluorescent emission spectra of TBAPy before (black line) and after adding interfering proteins (red line), and added protamine to the above solutions (blue line) in aqueous solutions.

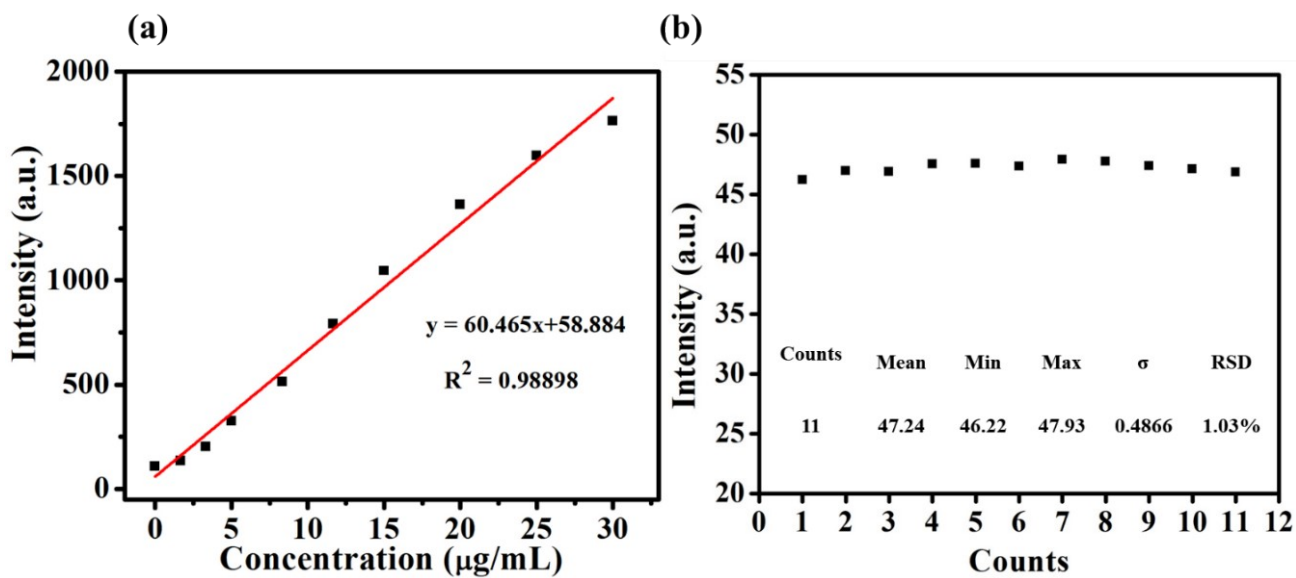

**Figure S2.** (a) Linear fit between emission intensity and protamine concentration (0-30  $\mu\text{g/mL}$ ) in TBAPy (0.02 mg/mL) aqueous solutions. (b) Fluorescent intensity of TBAPy (0.02 mg/mL) in aqueous solutions after different measurements.

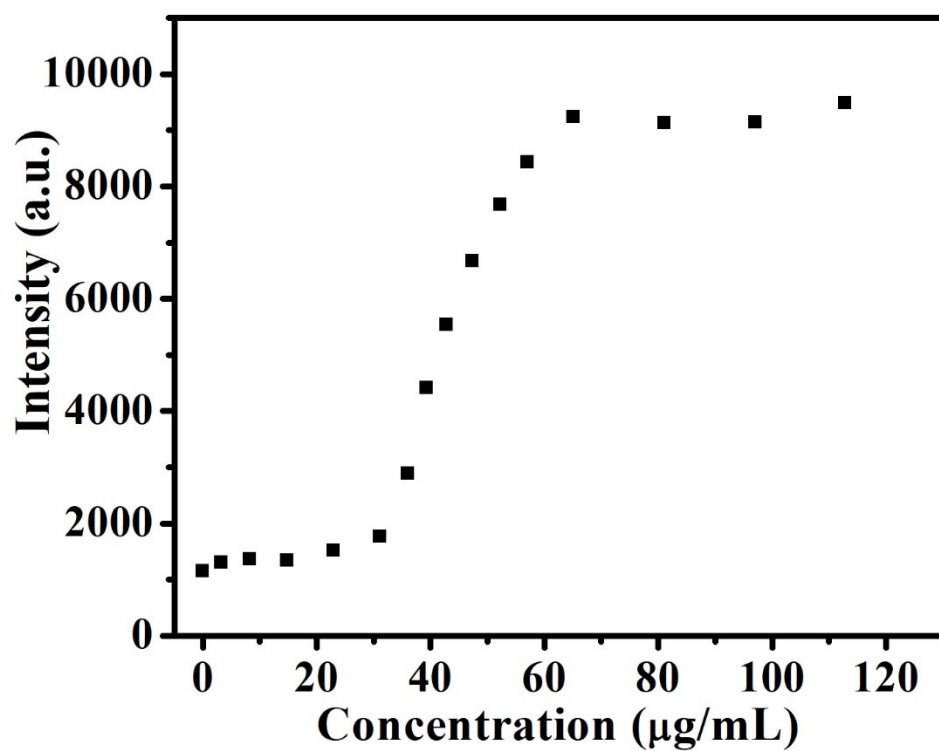

**Figure S3.** Plots of the fluorescence intensity of TBAPy-protamine system with the concentration of heparin.

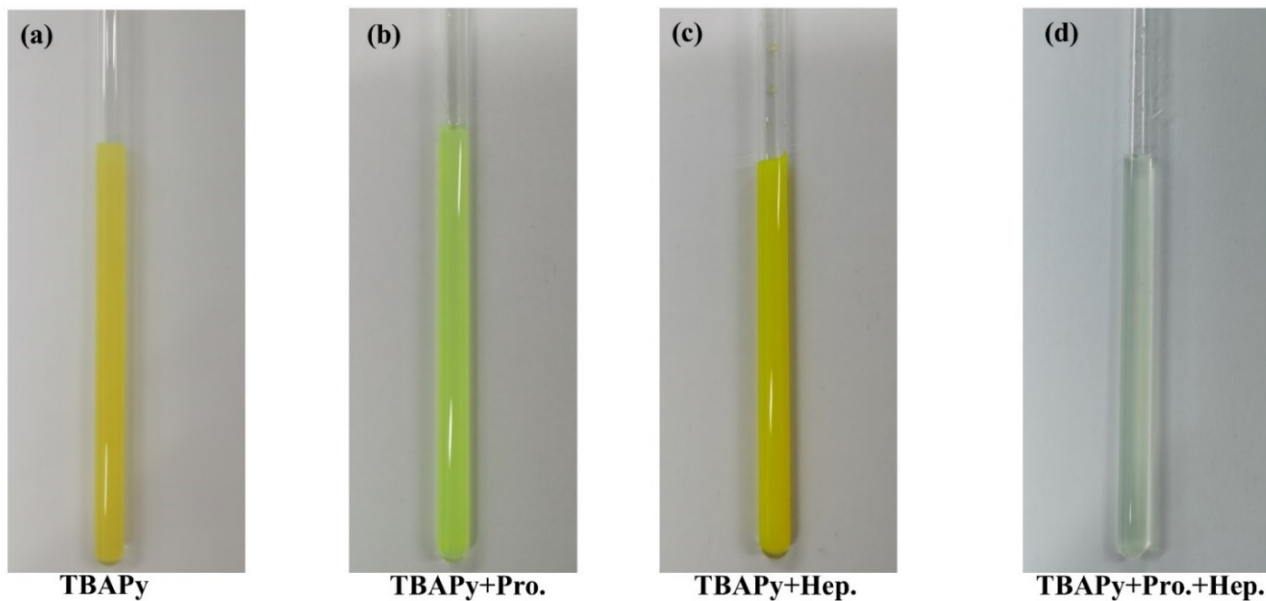

**Figure S4.** Photo images of different components in aqueous solutions in NMR tubes: (a) TBAPy; (b) TBAPy+Pro.; (c) TBAPy+Hep. and (d) TBAPy+Pro.+Hep..

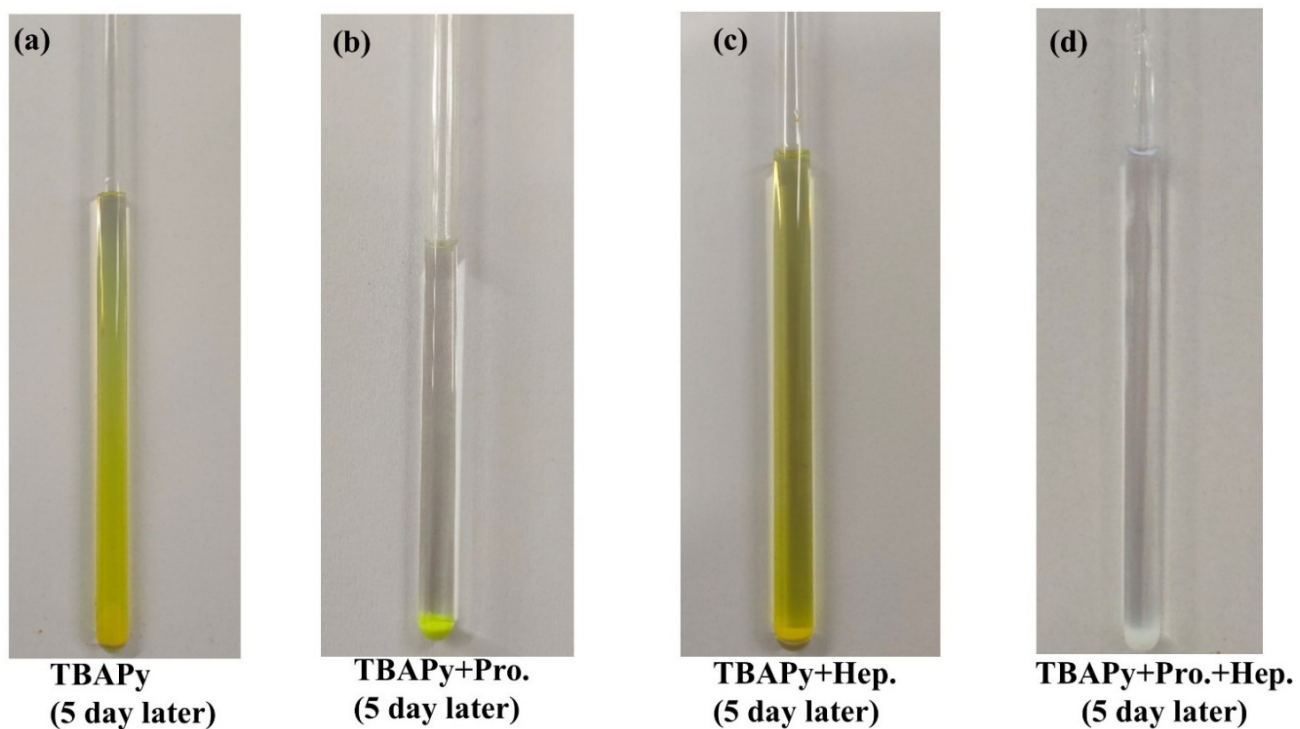

**Figure S5.** Photos of different components in aqueous solutions in NMR tubes after standing for 5 days: (a) TBAPy; (b) TBAPy+Pro.; (c) TBAPy+Hep.; and (d) TBAPy+Pro.+Hep..

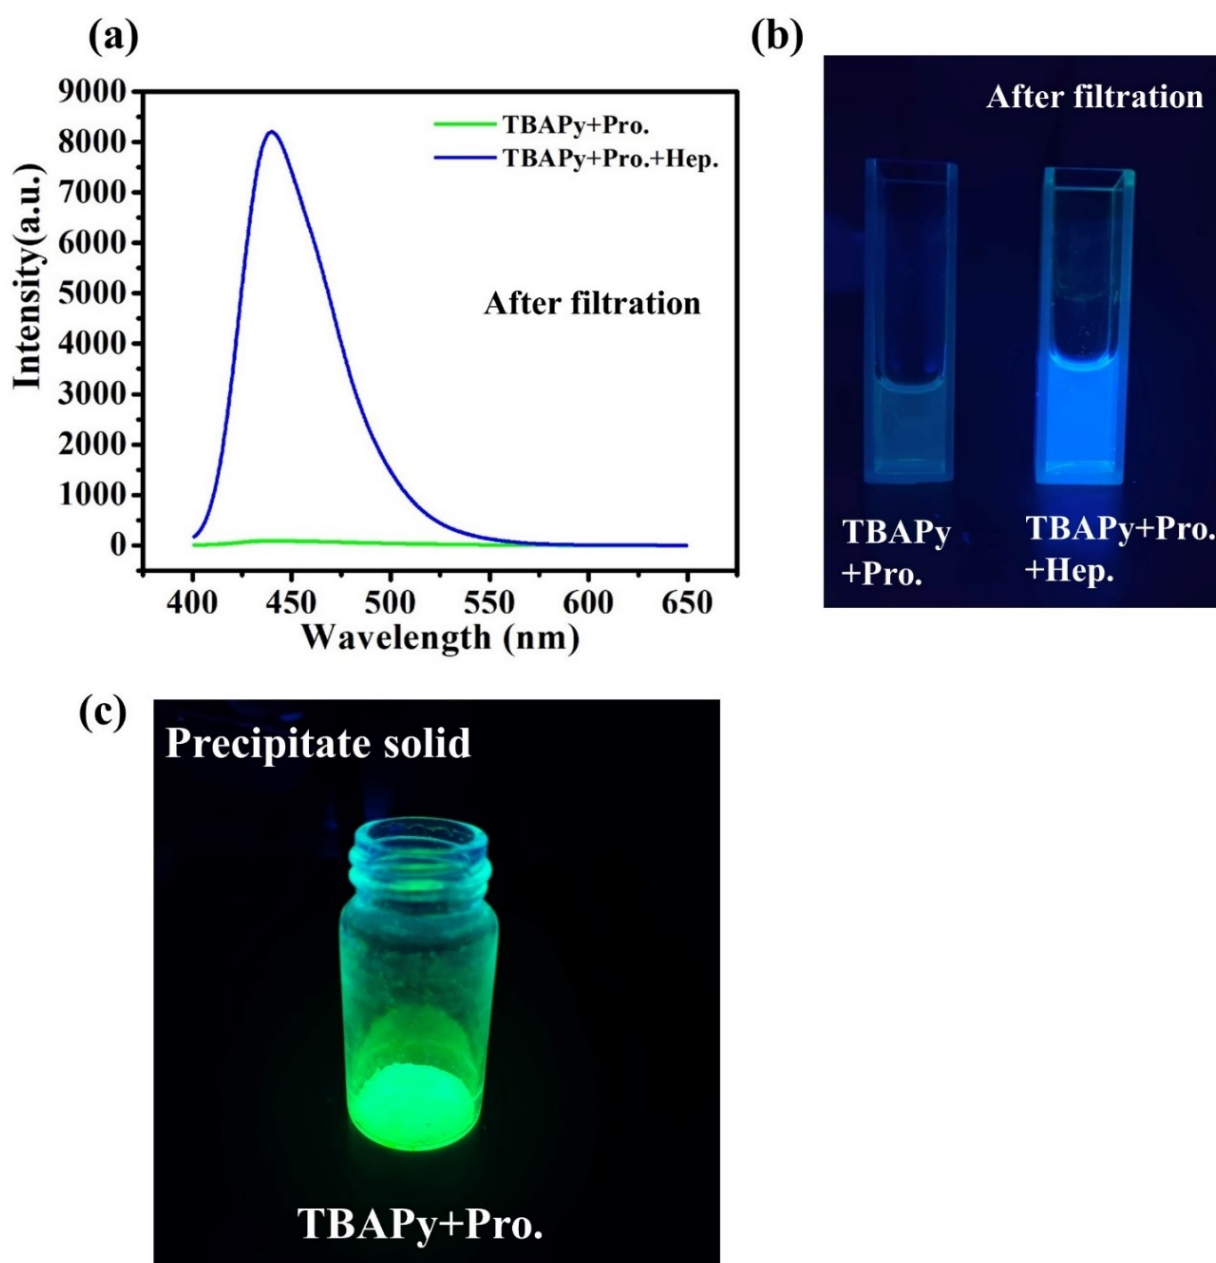

**Figure S6.** (a) Fluorescence emission spectra of the upper transparent aqueous solutions of TBAPy+Pro.(green line) and TBAPy+Pro.+Hep. (blue line) after filtration to remove the precipitates. (b) Photographs of the upper clear aqueous solution of TBAPy+Pro. and TBAPy+Pro.+Hep. under an ultraviolet light lamp ( $\lambda_{\text{ex}}=365$  nm). (c) The photo image of TBAPy+Pro. precipitate solid after removed the upper aqueous solution under an ultraviolet light lamp ( $\lambda_{\text{ex}}=365$  nm).

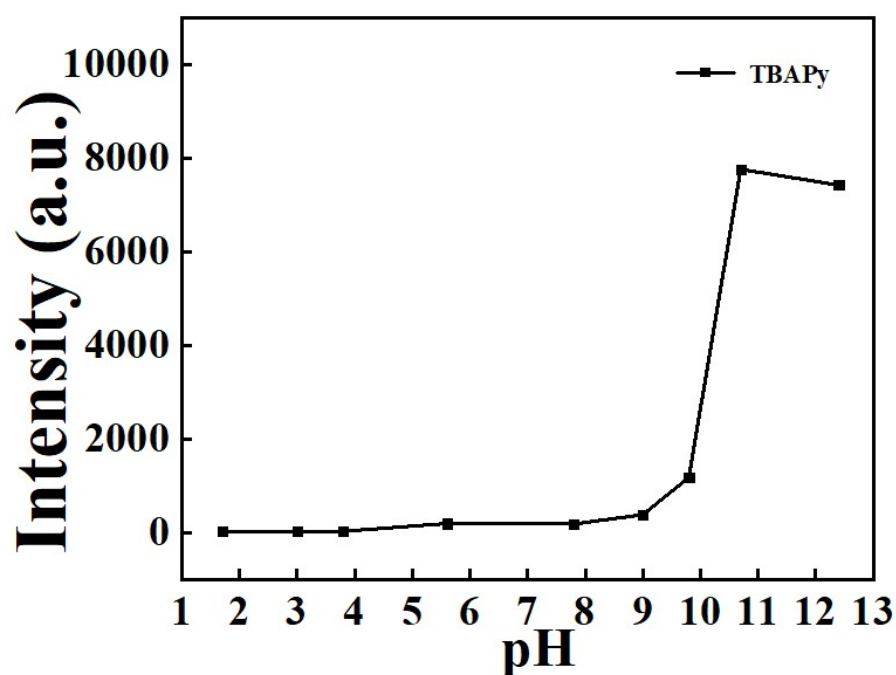

**Figure S7.** The fluorescent emission spectra of TBAPy in aqueous solutions with the variation of pH.

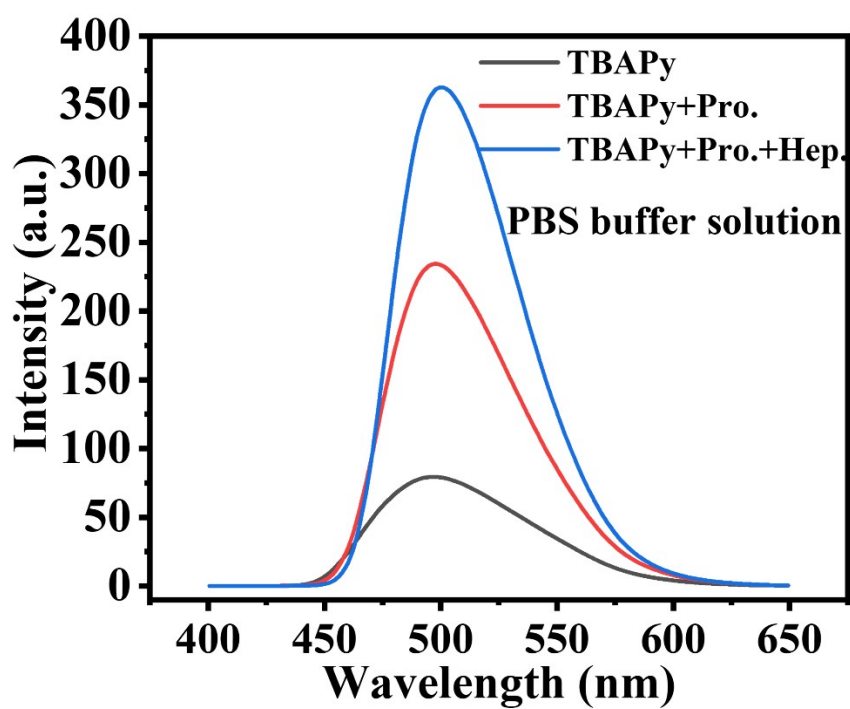

**Figure S8.** Fluorescence emission spectra of TBAPy interacting with protamine and heparin in phosphate-buffered saline (PBS) buffer solution. <sup>[1, 2]</sup>



**Table S1**

Comparison of the analytical data of some reported methods for the determination of protamine.

| <b>Method</b> | <b>Linear range</b> | <b>Detection limit</b> | <b>References</b> |
|---------------|---------------------|------------------------|-------------------|
| HPLC          | 15–100 µg/mL        | 15 µg/mL               | [3]               |
| Probe1        | 0–1000 µg/mL        | 100 ng/mL              | [4]               |
| CHSA          | 1–5 µg/mL           | 43 ng/mL               | [5]               |
| DSA-4COOH     | 0–0.4 µg/mL         | 30 ng/mL               | [6]               |
| Si-QDs        | 0–1.2 µg/mL         | 6.7 ng/m               | [7]               |
| TPHA          | 0–6 µg/mL           | 4.78 ng/mL             | [8]               |

## Reference

- [1] Wang XD, Liu ZQ, Gao PF, Li YJ, Qu XY, Quantum dots mediated fluorescent “turn-off-on” sensor for highly sensitive and selective sensing of protein. *Colloid. Surf. B. Biointerfaces* 2020, **185**, 110599.
- [2] Bao QZ, Lin D, Gao YR, Wu LN, Fu JH, Galaa K, Lin XH, Lin LQ, Ultrasensitive off-on-off fluorescent nanosensor for protamine and trypsin detection based on inner-filter effect between N,S-CDs and gold nanoparticles. *Microchem. J.* 2021, **168**, 106409.
- [3] Snycerski A, Dudkiewicz-Wilczynska J, Tautt J. Determination of protamine sulphate in drug formulations using high performance liquid chromatography. *J. Pharm. Biomed. Anal.* 1998, **18**, 907–910
- [4] Suzuki Y, Yokoyama K. Design and Synthesis of Intramolecular Charge Transfer-Based Fluorescent Reagents for the Highly-Sensitive Detection of Proteins. *J. Am. Chem. Soc.* 2005, **127**, 17799–17802.
- [5] Chen XT, Xiang Y, Li N, Song PS, Tong AJ. Fluorescence turn-on detection of protamine based on aggregation-induced emission enhancement characteristics of 4-(6'-carboxyl)hexyloxysalicylaldehyde azine. *Analyst* 2010, **135**, 1098-1105.
- [6] Jiang R, Zhao S, Chen L, Zhao M, Qi W, Fu W, Hu L, Zhang Y. Fluorescence detection of protamine, heparin and heparinase II based on a novel AIE molecule with four carboxyl. *Int. J. Biol. Macromol.* 2020, **156**, 1153-1159.
- [7] Peng X, Long Q, Li H, Zhang Y, Yao S. “Turn on-off” fluorescent sensor for protamine and heparin based on label-free silicon quantum dots coupled with gold nanoparticles. *Sens. Actuators B: Chem.* 2015, **213**, 131-138.
- [8] Wang X, Jiang Q, Man Y, Feng S, Lee Y-I, Liu H-G. A novel amphiphilic pH-responsive AIEgen for highly sensitive detection of protamine and heparin. *Sens Actuators B: Chem.* 2018, **261**, 233-240.
